# Supplementary material for: In Vitro Inhibition of Colorectal Cancer Gene Targets by Withania somnifera L. Methanolic Extracts: A Focus on Specific Genome Regulation
Source: MDPI journal article supplement (doi:10.3390/nu16081140), 2024-04-12
Supplement: s1 [file s1]

**Table S1.** Results of the correlation between the content of methanolic extracts and the desired genes' activity

| Dependent Variable | (I) Conc | (J) Conc | Mean Difference (I-J) | Std. Error | Sig.  | 95% Confidence Interval |             |
|--------------------|----------|----------|-----------------------|------------|-------|-------------------------|-------------|
|                    |          |          |                       |            |       | Lower Bound             | Upper Bound |
| <i>COX2</i>        | .00      | .50      | .0016333              | .0034642   | .963  | -.009460                | .012727     |
|                    |          | 1.00     | .0018333              | .0034642   | .950  | -.009260                | .012927     |
|                    |          | 2.00     | .0146333*             | .0034642   | .012  | .003540                 | .025727     |
|                    | .50      | .00      | -.0016333             | .0034642   | .963  | -.012727                | .009460     |
|                    |          | 1.00     | .0002000              | .0034642   | 1.000 | -.010894                | .011294     |
|                    |          | 2.00     | .0130000*             | .0034642   | .023  | .001906                 | .024094     |
|                    | 1.00     | .00      | -.0018333             | .0034642   | .950  | -.012927                | .009260     |
|                    |          | .50      | -.0002000             | .0034642   | 1.000 | -.011294                | .010894     |
|                    |          | 2.00     | .0128000*             | .0034642   | .025  | .001706                 | .023894     |
|                    | 2.00     | .00      | -.0146333*            | .0034642   | .012  | -.025727                | -.003540    |
|                    |          | .50      | -.0130000*            | .0034642   | .023  | -.024094                | -.001906    |
|                    |          | 1.00     | -.0128000*            | .0034642   | .025  | -.023894                | -.001706    |
| <i>Lox5</i>        | .00      | .50      | -.2819333             | .0969382   | .076  | -.592364                | .028497     |
|                    |          | 1.00     | .3304333*             | .0969382   | .037  | .020003                 | .640864     |
|                    |          | 2.00     | .6788333*             | .0969382   | .001  | .368403                 | .989264     |
|                    | .50      | .00      | .2819333              | .0969382   | .076  | -.028497                | .592364     |
|                    |          | 1.00     | .6123667*             | .0969382   | .001  | .301936                 | .922797     |
|                    |          | 2.00     | .9607667*             | .0969382   | .000  | .650336                 | 1.271197    |
|                    | 1.00     | .00      | -.3304333*            | .0969382   | .037  | -.640864                | -.020003    |
|                    |          | .50      | -.6123667*            | .0969382   | .001  | -.922797                | -.301936    |
|                    |          | 2.00     | .3484000*             | .0969382   | .029  | .037970                 | .658830     |
|                    | 2.00     | .00      | -.6788333*            | .0969382   | .001  | -.989264                | -.368403    |
|                    |          | .50      | -.9607667*            | .0969382   | .000  | -1.271197               | -.650336    |
|                    |          | 1.00     | -.3484000*            | .0969382   | .029  | -.658830                | -.037970    |
| <i>Bcl2</i>        | .00      | .50      | -.0027667             | .0012437   | .196  | -.006749                | .001216     |
|                    |          | 1.00     | .0018333              | .0012437   | .493  | -.002149                | .005816     |
|                    |          | 2.00     | .0039667              | .0012437   | .051  | -.000016                | .007949     |
|                    | .50      | .00      | .0027667              | .0012437   | .196  | -.001216                | .006749     |
|                    |          | 1.00     | .0046000*             | .0012437   | .025  | .000617                 | .008583     |
|                    |          | 2.00     | .0067333*             | .0012437   | .003  | .002751                 | .010716     |
|                    | 1.00     | .00      | -.0018333             | .0012437   | .493  | -.005816                | .002149     |
|                    |          | .50      | -.0046000*            | .0012437   | .025  | -.008583                | -.000617    |
|                    |          | 2.00     | .0021333              | .0012437   | .376  | -.001849                | .006116     |
|                    | 2.00     | .00      | -.0039667             | .0012437   | .051  | -.007949                | .000016     |
|                    |          | .50      | -.0067333*            | .0012437   | .003  | -.010716                | -.002751    |
|                    |          | 1.00     | -.0021333             | .0012437   | .376  | -.006116                | .001849     |
| <i>BclXL</i>       | .00      | .50      | -1.2612333*           | .3086234   | .015  | -2.249554               | -.272913    |
|                    |          | 1.00     | .5834667              | .3086234   | .304  | -.404854                | 1.571787    |
|                    |          | 2.00     | .9632000              | .3086234   | .056  | -.025121                | 1.951521    |
|                    | .50      | .00      | 1.2612333*            | .3086234   | .015  | .272913                 | 2.249554    |
|                    |          | 1.00     | 1.8447000*            | .3086234   | .001  | .856379                 | 2.833021    |
|                    |          | 2.00     | 2.2244333*            | .3086234   | .000  | 1.236113                | 3.212754    |
|                    | 1.00     | .00      | -.5834667             | .3086234   | .304  | -1.571787               | .404854     |
|                    |          | .50      | -1.8447000*           | .3086234   | .001  | -2.833021               | -.856379    |
|                    |          | 2.00     | .3797333              | .3086234   | .627  | -.608587                | 1.368054    |

|        |      |      |             |          |      |           |           |
|--------|------|------|-------------|----------|------|-----------|-----------|
|        | 2.00 | .00  | -.9632000   | .3086234 | .056 | -1.951521 | .025121   |
|        |      | .50  | -2.2244333* | .3086234 | .000 | -3.212754 | -1.236113 |
|        |      | 1.00 | -.3797333   | .3086234 | .627 | -1.368054 | .608587   |
| CASP 9 | .00  | .50  | .8753333*   | .2703405 | .048 | .009608   | 1.741059  |
|        |      | 1.00 | .5337333    | .2703405 | .273 | -.331992  | 1.399459  |
|        |      | 2.00 | -.2762667   | .2703405 | .742 | -1.141992 | .589459   |
|        | .50  | .00  | -.8753333*  | .2703405 | .048 | -1.741059 | -.009608  |
|        |      | 1.00 | -.3416000   | .2703405 | .608 | -1.207325 | .524125   |
|        |      | 2.00 | -1.1516000* | .2703405 | .012 | -2.017325 | -.285875  |
|        | 1.00 | .00  | -.5337333   | .2703405 | .273 | -1.399459 | .331992   |
|        |      | .50  | .3416000    | .2703405 | .608 | -.524125  | 1.207325  |
|        |      | 2.00 | -.8100000   | .2703405 | .067 | -1.675725 | .055725   |
|        | 2.00 | .00  | .2762667    | .2703405 | .742 | -.589459  | 1.141992  |
|        |      | .50  | 1.1516000*  | .2703405 | .012 | .285875   | 2.017325  |
|        |      | 1.00 | .8100000    | .2703405 | .067 | -.055725  | 1.675725  |

\*At the level of the 0.05 threshold, there is a significant mean difference.

Intervention: Methanol-based extracts of *W. somnifera*
